# Supplementary material for: Exploring the Effect of the Gut Microbiome on the Risk of Age-Related Macular Degeneration From the Perspective of Causality
Source: PubMed Central journal article supplement — Invest Ophthalmol Vis Sci. 2023 Jun 14;64(7):22. doi: 10.1167/iovs.64.7.22 (PMC10275387; doi:10.1167/iovs.64.7.22), 2023-06-14
Supplement: iovs-64-7-22_s001.pdf [file iovs-64-7-22_s001.pdf]

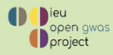

# MR database

42,334 GWAS involving 244,792,068,559 genetic associations

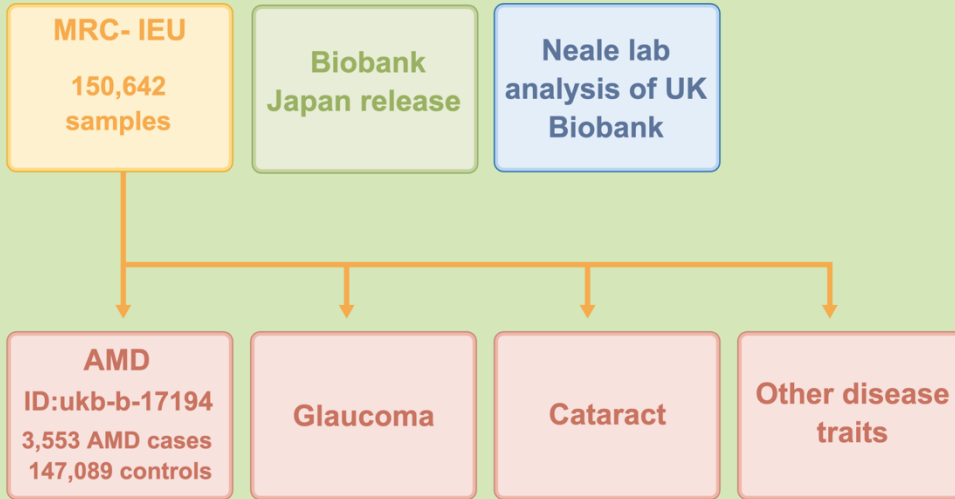

Supplementary Figure 1 AMD - GWAS (ID: ukb-b-17194) from MR database based on MRC-IEU.
